# Supplementary material for: Estimation of Mycobacterium avium subsp. paratuberculosis load in raw bulk tank milk in Emilia‐Romagna Region (Italy) by qPCR
Source: PubMed Central journal article supplement (PMC4985589; doi:10.1002/mbo3.350), 2016-03-17
Supplement: MBO3-5-551-s001.pdf [file MBO3-5-551-s001.pdf]

1 Figure 1 Supplemental Material

2 a)

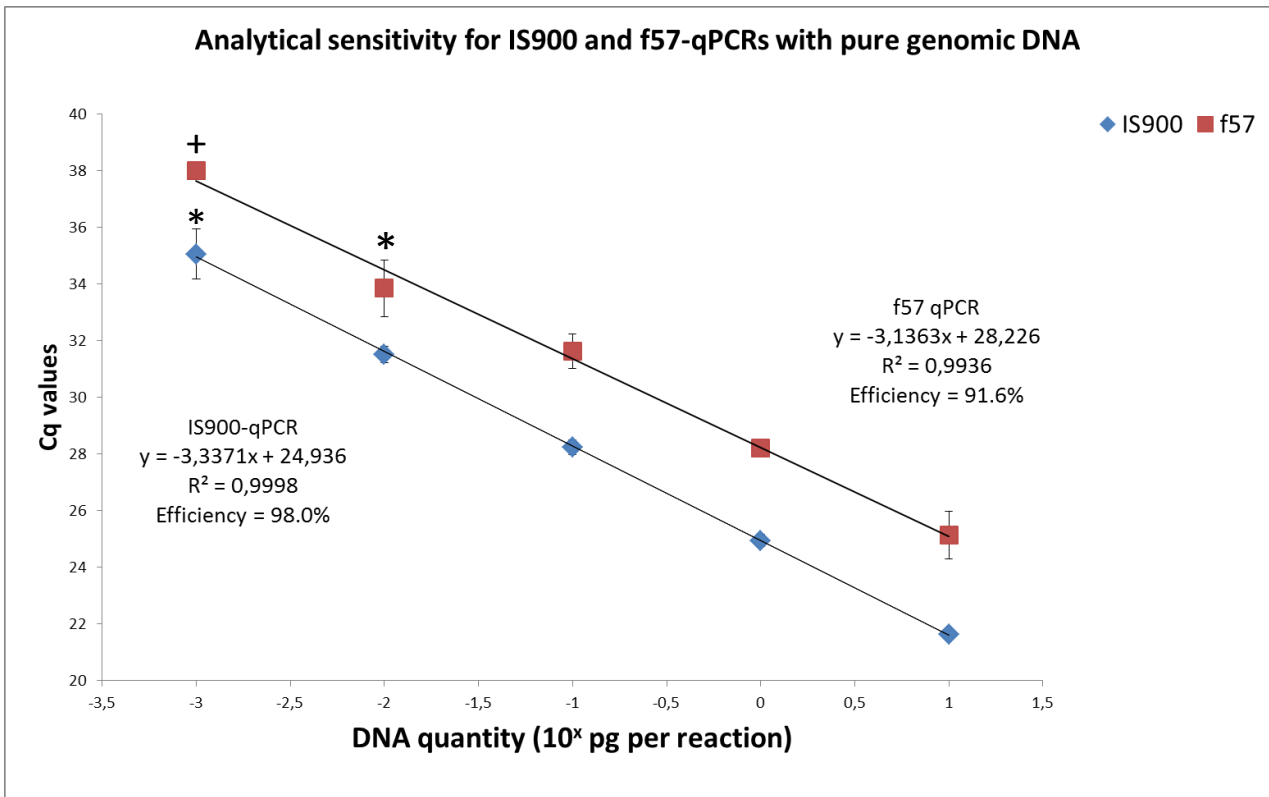

3

4

5 The graph shows the analytical sensitivity (hypothetical optimal condition) of IS900  
6 and f57-qPCRs expressed as *pg* of pure MAP DNA, ranging from  $10^{-3}$  to  $10^1$  *pg* of  
7 MAP DNA *per* tube reaction. Each point represents the mean values  $\pm$ SD of three  
8 different experiments in quadruplicated. Efficiency was evaluated with the equation  
9  $Efficiency = 10^{-1/slope} - 1$ . Purified MAP DNA was kindly provided by Dr. Karren  
10 Plain.

11 \* 10 out of 12 positive calls

12 + 1 out of 12 positive calls

13

14 b)

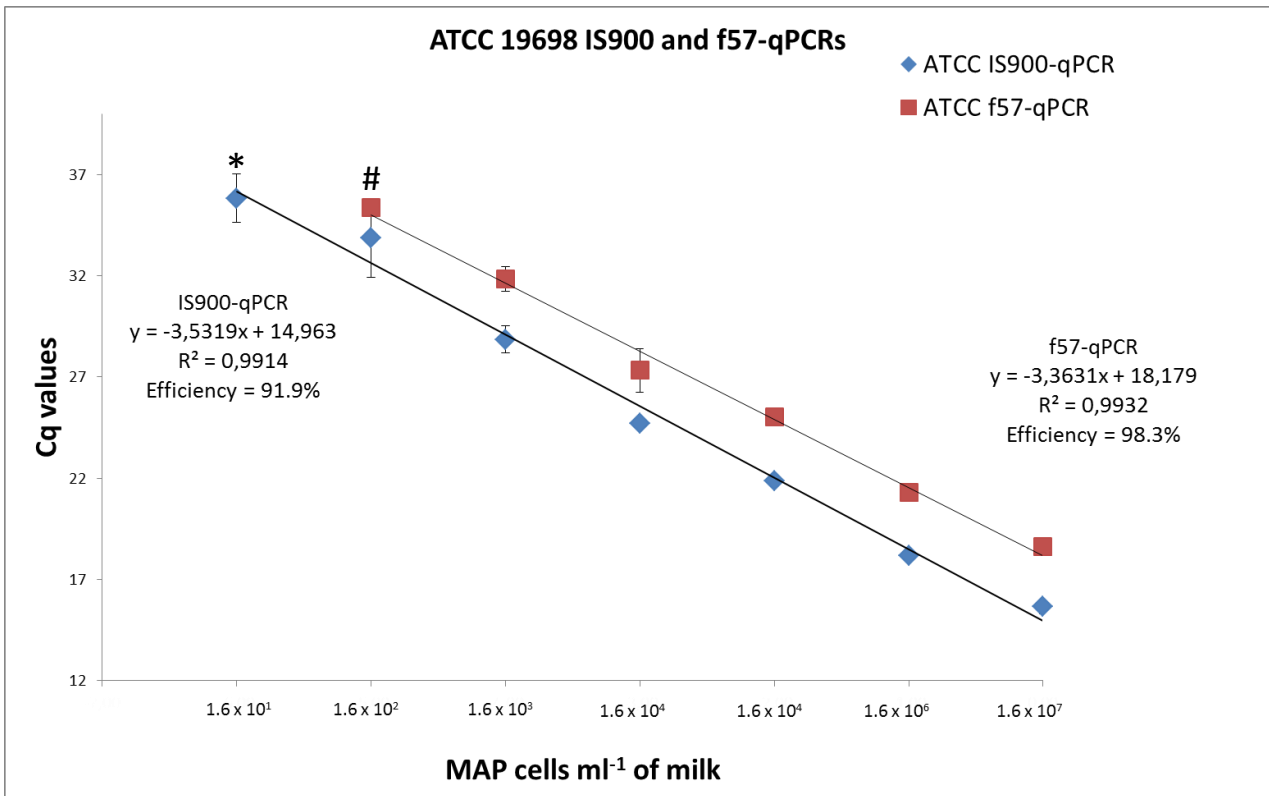

15

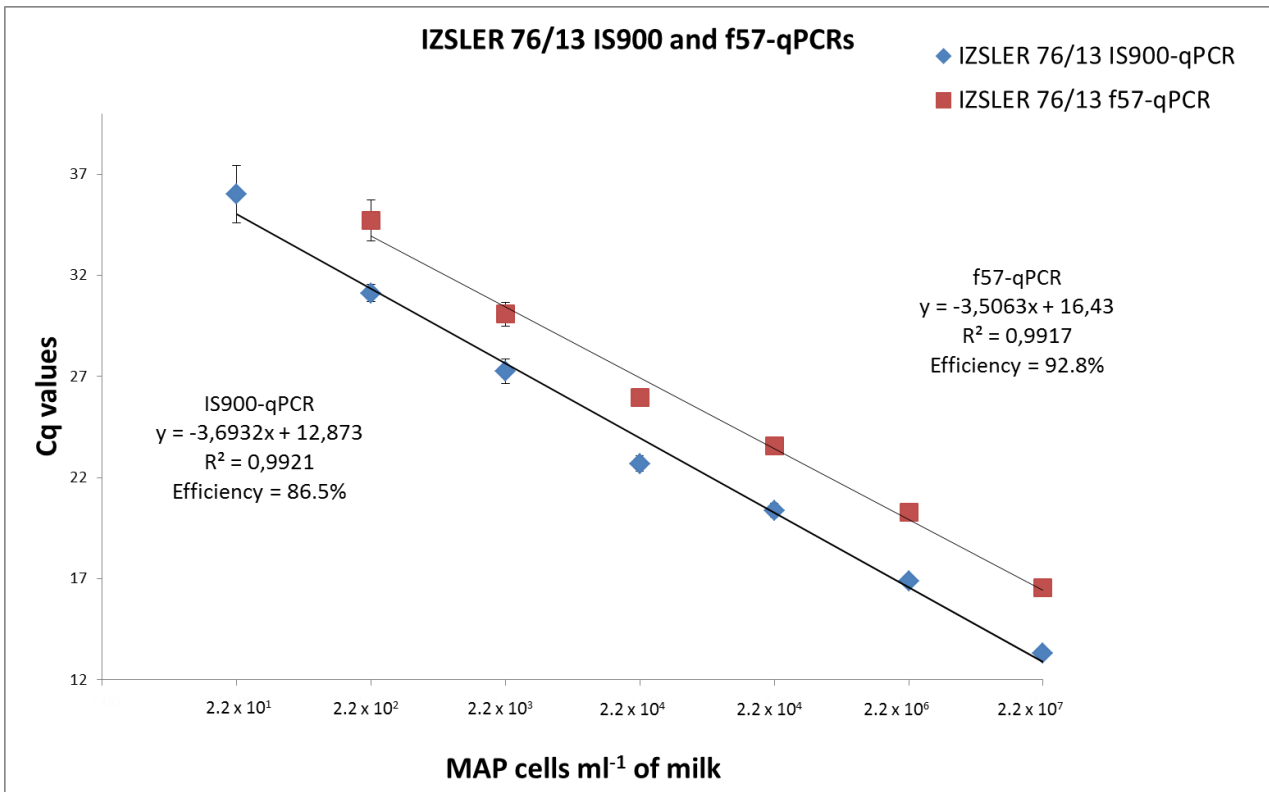

16

17 The graphs show the linear range of IS900 and f57-qPCRs relative to milk samples  
18 spiked with ATCC 19698 and IZSLER 76/13 strains respectively. DNA was  
19 extracted according to the procedure described in the paper. Each point represents the

- 20 mean values  $\pm$ SD of five replicates. Efficiency was evaluated with the equation  
21  $\text{Efficiency} = 10^{-1/\text{slope}} - 1$ .
- 22 \* 4 out of 5 positive calls
- 23 # 1 out of 5 positive calls
